# Supplementary material for: Achieving environment-friendly production of CsPbBr3 films for efficient solar cells via precursor engineering
Source: Royal Society of Chemistry journal article supplement (doi:10.1039/d1gc00106j), 2021-01-01
Supplement: d1gc00106j1.pdf [file d1gc00106j1.pdf]

## Supporting Information

# Achieving environment-friendly production of CsPbBr<sub>3</sub> films for efficient solar cells via precursor engineering

Xiaobing Cao<sup>1</sup>, Guoshuai Zhang<sup>1</sup>, Long Jiang<sup>1</sup>, Yifan Cai<sup>1</sup>, Yu Wang,<sup>1</sup> Xin He<sup>1</sup>, Qingguang  
Zeng<sup>1</sup>, Jiangzhao Chen<sup>2\*</sup>, Yi Jia<sup>3\*</sup>, Jinquan Wei<sup>4\*</sup>

1. School of Applied Physics and Materials, Wuyi University, Jiangmen, Guangdong 529020, P.R. China
2. Key Laboratory of Optoelectronic Technology & Systems (Ministry of Education) College of Optoelectronic Engineering, Chongqing University, Chongqing 400044, P. R. China
3. Qian Xuesen Laboratory of Space Technology, China Academy of Space Technology, Beijing 100094, P. R. China
4. State Key Lab of New Ceramic and Fine Processing, Tsinghua University, Beijing 100084, P.R. China

\*Corresponding Authors. E-mail: [jiangzhaochen@cqu.edu.cn](mailto:jiangzhaochen@cqu.edu.cn); [jiayi@qxslab.cn](mailto:jiayi@qxslab.cn); [jqwei@tsinghua.edu.cn](mailto:jqwei@tsinghua.edu.cn). Tel: +86-10-62781065.

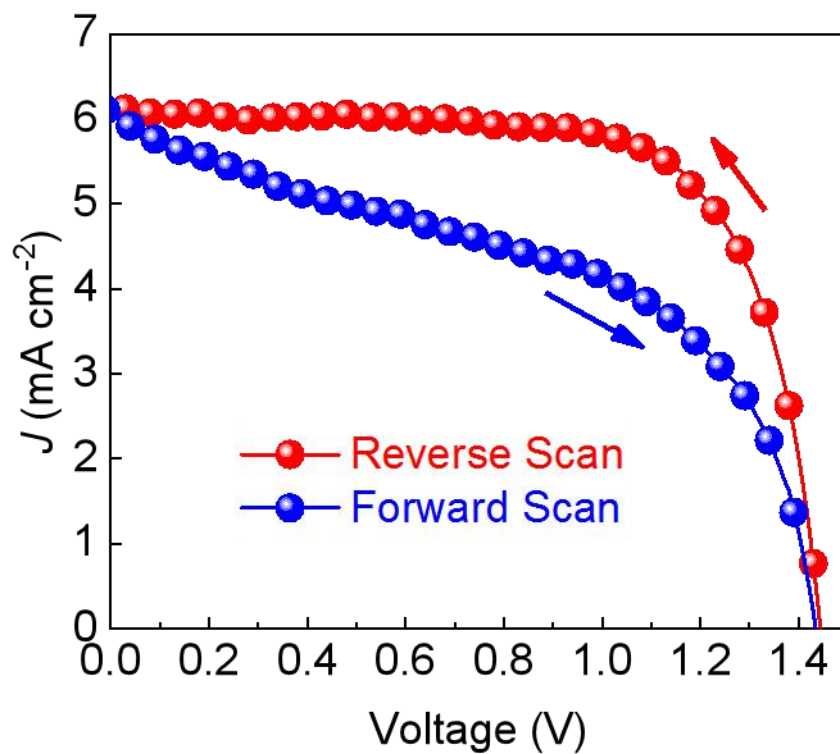

**Figure S1.** Hysteresis behavior of the CsPbBr<sub>3</sub> solar cells fabricated from the Pb(NO<sub>3</sub>)<sub>2</sub>/H<sub>2</sub>O solution.

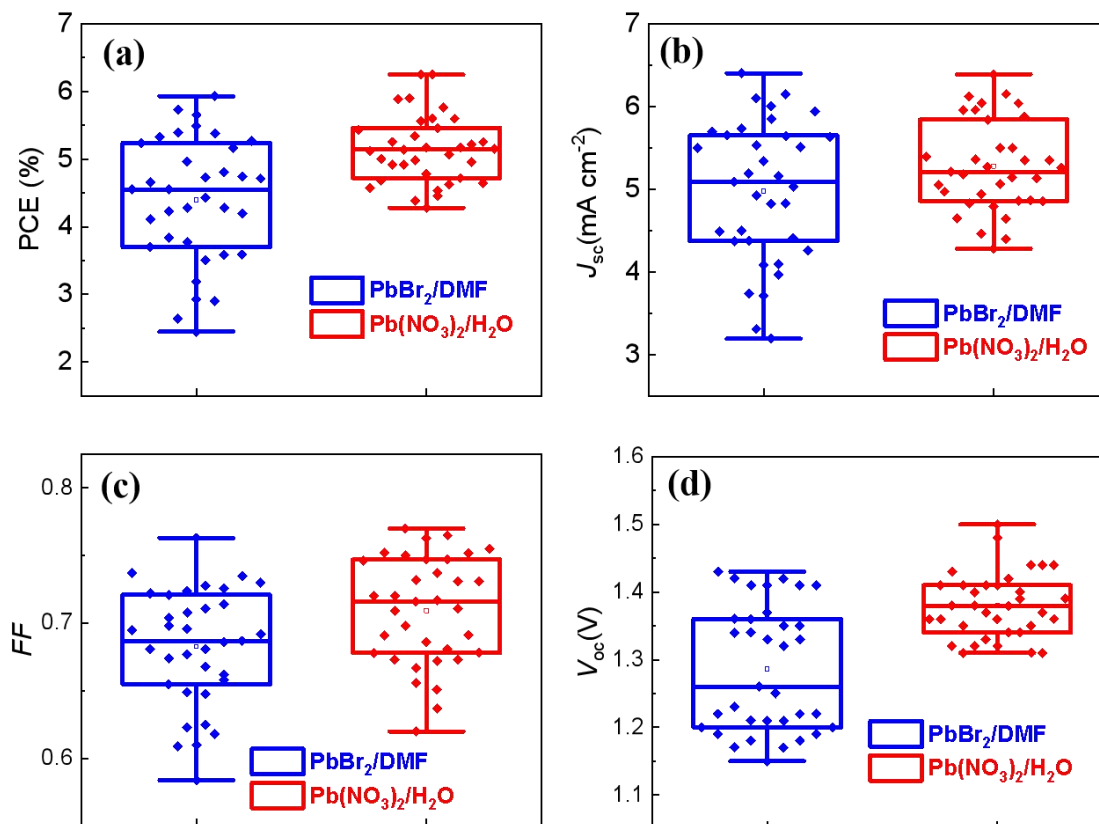

**Figure S2.** Box chart of photovoltaic parameters of PSCs prepared from different solutions.

(a) PCE; (b)  $J_{sc}$ ; (c) FF; (d)  $V_{oc}$ .

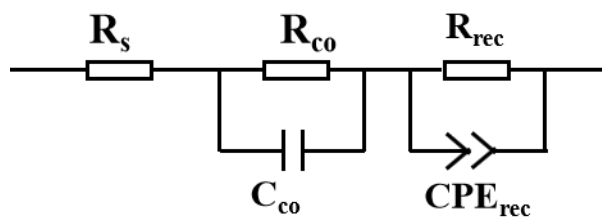

**Figure S3** The equivalent circuit used to analyse the impedance spectroscopy spectra.

**Table S1** The fitting results of impedance spectroscopy spectra.

| Samples                                             | $R_s$ ( $\Omega$ ) | $R_{co}$ ( $\Omega$ ) | $C_{co}$ ( $\mu\text{F}$ ) | $R_{rec}$ ( $\Omega$ ) | $CPE_{rec}$ ( $\mu\text{F}$ ) |
|-----------------------------------------------------|--------------------|-----------------------|----------------------------|------------------------|-------------------------------|
| PbBr <sub>2</sub> /DMF                              | 61.74              | 1141                  | 0.685                      | 4396                   | 3.05                          |
| Pb(NO <sub>3</sub> ) <sub>2</sub> /H <sub>2</sub> O | 44.95              | 2033                  | 0.681                      | 6635                   | 5.59                          |
